# Supplementary material for: The bio-reduction of chromate with periplasmic reductase using a novel isolated strain Pseudoalteromonas sp. CF10-13
Source: Royal Society of Chemistry journal article supplement (doi:10.1039/c6ra16320c), 2016-01-01
Supplement: c6ra16320c1.pdf [file c6ra16320c1.pdf]

## Supplementary Material

### Bio-reduction of Chromate with periplasmic reductase by a novel isolated strain

#### *Pseudoalteromonas* sp. CF10-13

Na Li<sup>a</sup>, Yanzhuo Pan<sup>b</sup>, Na Zhang<sup>a</sup>, Xueyan Wang<sup>a</sup>, Weizhi Zhou <sup>a\*</sup>

<sup>a</sup> School of Environmental Science and Engineering, Shandong University, Jinan 250100, China

<sup>b</sup> Jinan Licheng NO.2 High School, Jinan 250104 China

\*Corresponding author:

Weizhi Zhou, School of Environmental Science and Engineering, Shandong University, Jinan 250100, China

Tel: +8653188361383 Fax: +8653188361383

E-mail: [wzzhou@sdu.edu.cn](mailto:wzzhou@sdu.edu.cn)

**Table and figure captions:**

**Table. S1** Cr(VI) reduction by different resting cells in Cr(VI) solution. (Cells grown in absence or presence of 10 mg/L Cr(VI))

**Table. S2** Peak numbers and relative content (RC) of the surface functional groups determined by XPS.

**Fig. S1** Consecutive changes of pH value with time (Cells grown with 50 mg/L Cr(VI)).

**Fig. S2** A magnified map of FTIR spectra of *P. sp.* CF10-13 cultured without or with 50 mg/L Cr(VI).

**Fig. S3** XPS spectra of *P. sp.* CF10-13 cultured with 50 mg/L Cr(VI) for 24 h (a) and 52 h (b) with *P. sp.* CF10-13 cultured in optimum condition.

**Table. S1** Cr(VI) reduction by different resting cells in Cr(VI) solution.

| RE (%)                                | In Cr(VI) solution |         |
|---------------------------------------|--------------------|---------|
|                                       | 25 mg/L            | 50 mg/L |
| control                               | 0                  | 0       |
| Grown in absence of Cr(VI)            | 0.61               | 0       |
| Grown in presence of Cr(VI) (10 mg/L) | 44.90              | 31.20   |

Inductivity of the Cr(VI) reductase was identified by pre-cultivating the bacteria in absence or presence of 10mg/L Cr(VI). As showed (Table. S1), 44.90 % and 31.20 % Cr(VI) were reduced by resting cells pre-cultivated with Cr(VI). While no Cr(VI) was reduced with resting cells pre-cultivated in Cr(VI)-free media. These data suggested that Cr(VI) reductase produced by *P. sp.* CF10-13 was a kind of inducible enzyme.

**Table. S2** Peak numbers and relative content (RC) of the surface functional groups determined by XPS.

| Samples | b (24h) |        | c (52h) |        |
|---------|---------|--------|---------|--------|
|         | BE (eV) | RC (%) | BE (eV) | RC (%) |
| Peak1   | 284.60  | 66.11  | 284.80  | 61.14  |
| Peak2   | 285.90  | 23.49  | 286.20  | 25.49  |
| Peak3   | 287.80  | 10.40  | 287.80  | 13.37  |

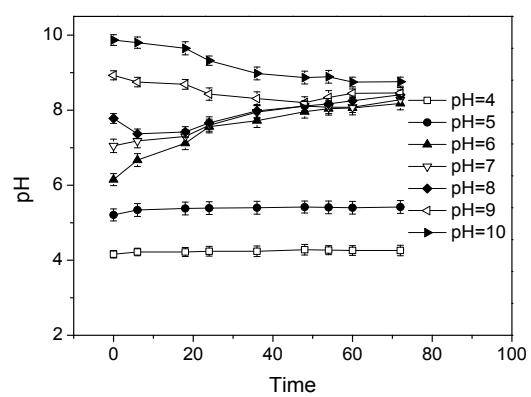

**Fig. S1**

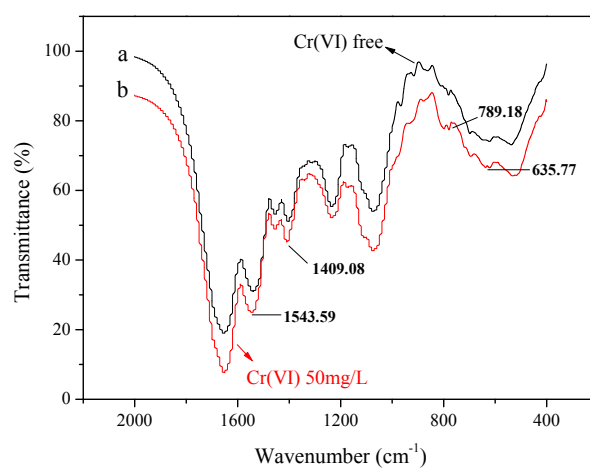

**Fig. S2** A magnified map of FTIR spectra of *P. sp.* CF10-13 cultured without or with 50 mg/L Cr(VI).

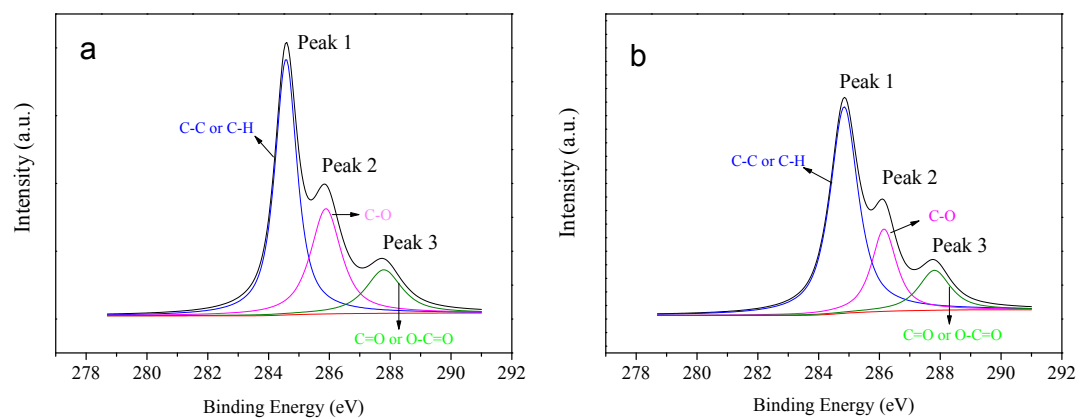

**Fig. S3** XPS spectra of *P. sp.* CF10-13 cultured with 50 mg/L Cr(VI) for 24 h (a) and 52 h (b) with *P. sp.* CF10-13 cultured in optimum condition.
